# Supplementary material
Source: Springer Nature journal article supplement (https://www.springermedizin.de/resource/supplementary/12878_2013_10_MOESM1_ESM.pdf/9686334)
Supplement: MOESM1 [file 9686334]

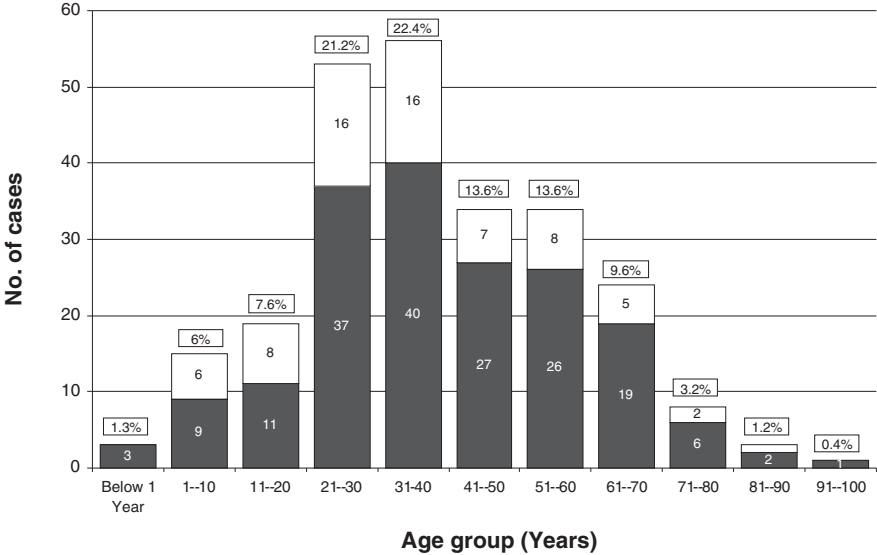

■ Male[M] - 181 □ Female [F] - 69 Total - 250 Male to Female Ratio = 2.62:1

| Age and Sex distribution of cases studied |            |            |            |            |
|-------------------------------------------|------------|------------|------------|------------|
| Age Group (in years)                      | Male (M)   | Female (F) | Total no.  | Percentage |
| Below 1 year                              | 3          | -          | 3          | 1.2        |
| 1 – 10                                    | 9          | 6          | 15         | 6          |
| 11 – 20                                   | 11         | 8          | 19         | 7.6        |
| 21 – 30                                   | 37         | 16         | 53         | 21.2       |
| 31 – 40                                   | 40         | 16         | 56         | 22.4       |
| 41 – 50                                   | 27         | 7          | 34         | 13.6       |
| 51 – 60                                   | 26         | 8          | 34         | 13.6       |
| 61 – 70                                   | 19         | 5          | 24         | 9.6        |
| 71 – 80                                   | 6          | 2          | 8          | 3.2        |
| 81 – 90                                   | 2          | 1          | 3          | 1.2        |
| 91 – 100                                  | 1          | -          | 1          | 0.4        |
| <b>Total</b>                              | <b>181</b> | <b>69</b>  | <b>250</b> | <b>100</b> |
